# Supplementary material for: Inhibition of E. coli RecQ Helicase Activity by Structurally Distinct DNA Lesions: Structure—Function Relationships
Source: MDPI journal article supplement (doi:10.3390/ijms232415654), 2022-12-09
Supplement: s1 [file s1]

## Supporting Materials

# Inhibition of *E. coli* RecQ Helicase Activity by Structurally Distinct DNA Lesions: Structure – Function Relationships.

Ana H. Sales, Vincent Zheng, Maya A. Kenawy, Mark Kakembo, Lu Zhang<sup>‡</sup>, Vladimir Shafirovich, Suse Broyde<sup>\*</sup> and Nicholas E. Geacintov

Author correspondence: Nicholas E. Geacintov, ng1@nyu.edu.

1. The following experiment demonstrates that during the course of the experiments described in the body of the manuscript, the reannealing of the unwound BHQ fluorescence quencher with the C3-strand is unlikely at the 5 nM DNA concentration used in our experiments.

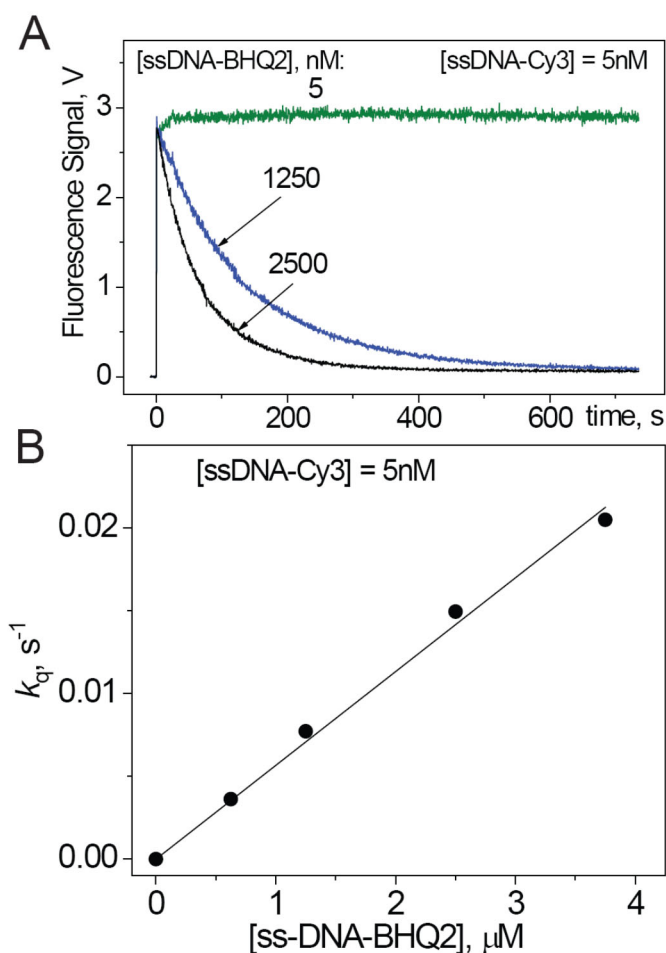

**Figure S1.** (A) Kinetics of fluorescence quenching initiated by the addition of 47-mer single-stranded oligonucleotides containing a BHQ2 quencher at the 3'-end (ssDNA-BHQ2) to 32-mer single-stranded oligonucleotides (5 nM) labelled with the Cy3 dye at the 5'-end (ssDNA-Cy3). No quenching observed at the 5 nM strand concentrations. (B) Dependence of the first-order rate constant of fluorescence quenching ( $k_q$ ) on the concentration of the quencher oligonucleotide (ssDNA-BHQ2). The solid line shows the best linear fit of the bimolecular rate constant of fluorescence quenching ( $k_Q$ ) to the data points at  $k_Q = (5.7 \pm 0.2) \times 10^3 \text{ M}^{-1} \text{ s}^{-1}$ . Consistent with panel (A), the bimolecular quenching constant is too small to be effective in the nM concentration range.

These results demonstrate that there is no re-annealing at the 5 nM DNA concentration used in our experiments (green line on the top). However, quenching does occur at higher concentrations of the BHQ strand.

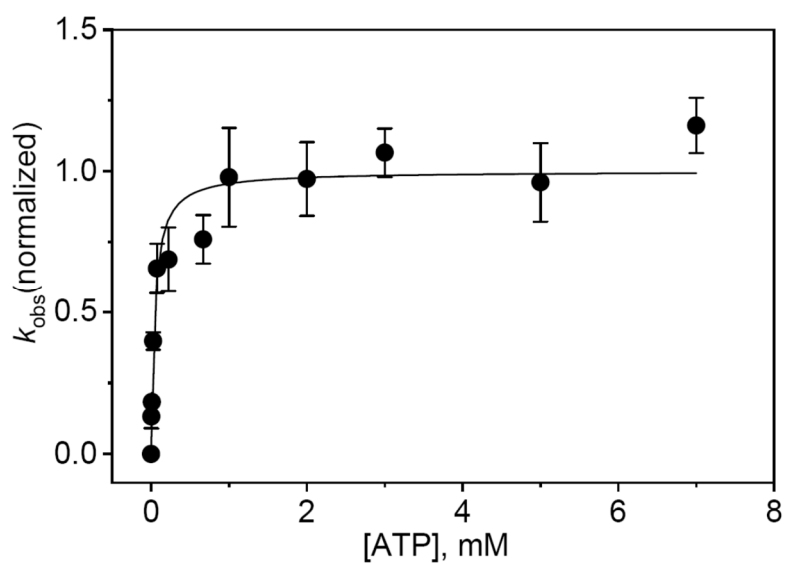

**Figure S2.** Effect of ATP concentration on the observed reaction rate constant. The values of  $k_{\text{obs}}$  obtained at different ATP concentrations were normalized relative to the  $k_{\text{obs}} = 0.0049 \text{ s}^{-1}$  value measured at  $[\text{ATP}] = 2 \text{ mM}$ ,  $[\text{DNA}] = 5 \text{ nM}$ .
